# Supplementary material for: Sex differences in the 1-year risk of dying following all-cause and cause-specific hospital admission after age 50 in comparison with a general and non-hospitalised population: a register-based cohort study of the Danish population
Source: PubMed Central journal article supplement — BMJ Open. 2018 Jul 17;8(7):e021813. doi: 10.1136/bmjopen-2018-021813 (PMC6059308; doi:10.1136/bmjopen-2018-021813), 2018-07-17
Supplement: bmjopen-2018-021813supp001.pdf [file bmjopen-2018-021813supp001.pdf]

## Supplementary Material

Supplementary table 1 – S: Classification of causes of hospital admission.

| Cause of hospital admission                  | ICD-8               | ICD-10              |
|----------------------------------------------|---------------------|---------------------|
| Infectious & parasitic diseases              | 000 - 136           | A00 - B99           |
| Neoplasms                                    | 140 - 239           | C00 - D48           |
| Diseases of the blood & blood-forming organs | 280 - 289           | D50 - D89           |
| Endocrine, nutritional & metabolic diseases  | 240 - 279           | E00 - E90           |
| Mental & behavioral disorders                | 290 - 315           | F00 - F99           |
| Diseases of the nervous system               | 320 - 358           | G00 - G99           |
| Diseases of the eye & adnexa                 | 360 - 379           | H00 - H59           |
| Diseases of the ear & mastoid process        | 380 - 389           | H60 - H95           |
| Ischemic heart diseases*                     | 410 - 414           | I20 - I25           |
| Cerebrovascular diseases*                    | 430 - 438           | I60 - I69           |
| Other circulatory diseases*                  | remaining 390 - 458 | remaining I00 - I99 |
| Respiratory diseases                         | 460 - 519           | J00 - J99           |
| Digestive diseases                           | 520 - 577           | K00 - K93           |
| Diseases of the skin & subcutaneous tissue   | 680 - 709           | L00 - L99           |
| Musculoskeletal disorders                    | 710 - 738           | M00 - M99           |
| Diseases of the genitourinary system         | 580 - 629           | N00 - N99           |
| Injuries, poisonings & accidents             | 800 - 999           | S00 - T98 & V01-Y98 |
| All other diseases                           | - all other -       | - all other -       |

\* the three causes were further grouped and referred to as circulatory diseases
